# Supplementary material for: Phylogeography and population genetic structure of the cardinal tetra ( Paracheirodon axelrodi ) in the Orinoco basin and Negro River (Amazon basin): evaluating connectivity and historical patterns of diversification
Source: PeerJ journal article supplement (doi:10.7717/peerj.15117), 2023-06-08

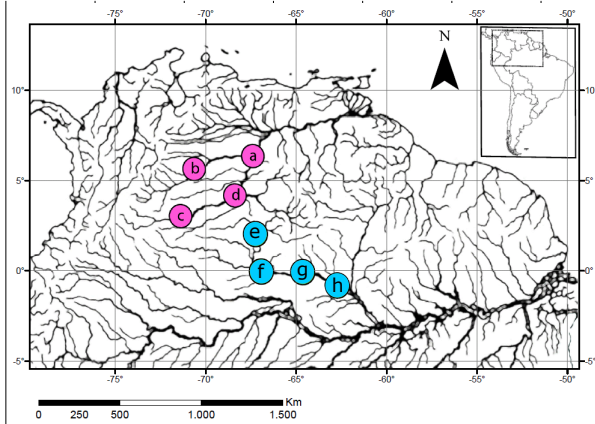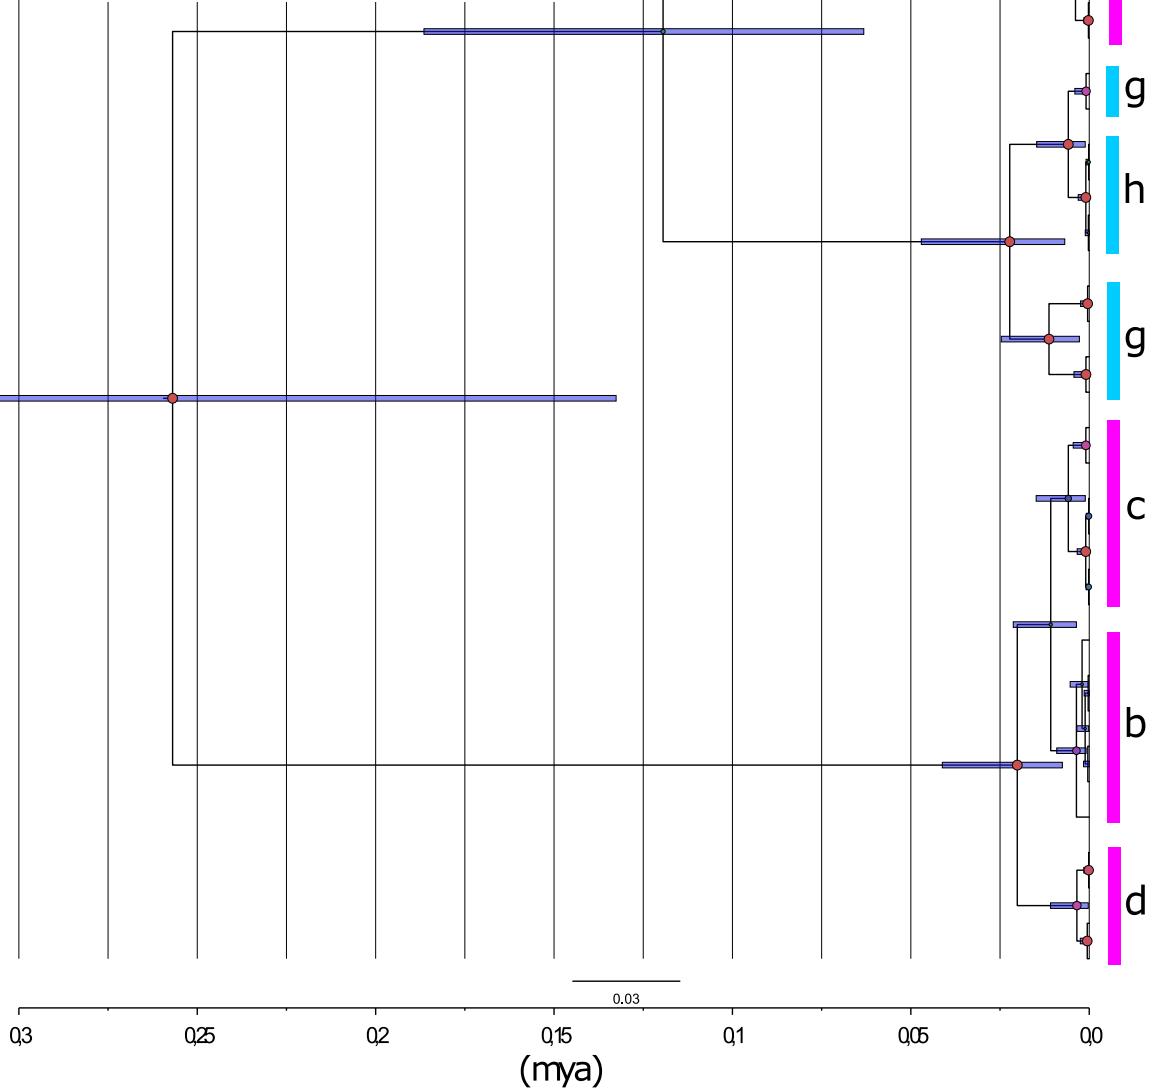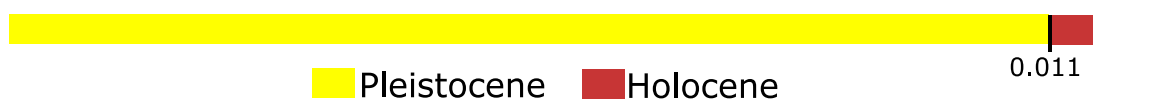

Supplement: Figure_S3.pdf [file Figure_S3.pdf]
