# Supplementary material for: Phylogeography and population genetic structure of the cardinal tetra ( Paracheirodon axelrodi ) in the Orinoco basin and Negro River (Amazon basin): evaluating connectivity and historical patterns of diversification
Source: PeerJ journal article supplement (doi:10.7717/peerj.15117), 2023-06-08

**A****Delta K**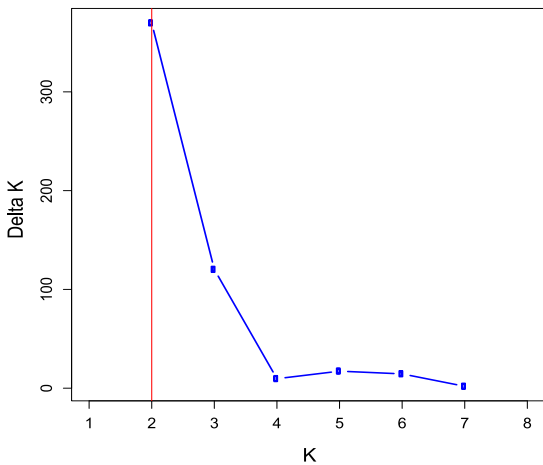**B****MedMed K**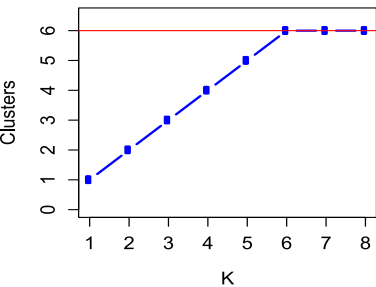**MedMean K**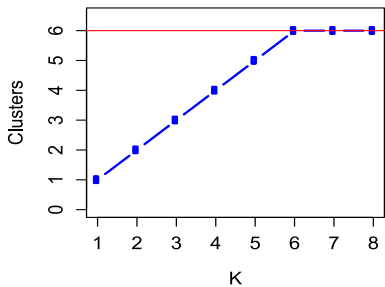**MaxMed K**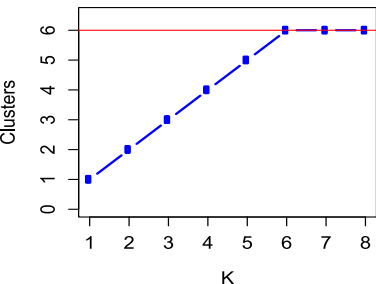**MaxMean K**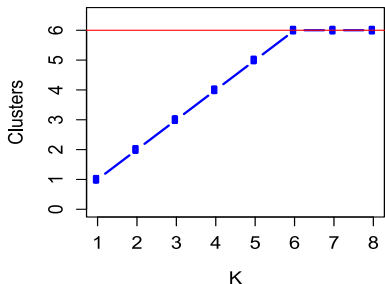

Supplement: Figure_S4.pdf [file Figure_S4.pdf]
