# Supplementary material for: Phylogeography and population genetic structure of the cardinal tetra (Paracheirodon axelrodi) in the Orinoco basin and Negro River (Amazon basin): evaluating connectivity and historical patterns of diversification
Source: PeerJ. 2023 Jun 8;11:e15117. doi: 10.7717/peerj.15117 (PMC10257900; doi:10.7717/peerj.15117)
Supplement: Supplemental Information 5 [file peerj-11-15117-s005.xlsx]

## Sheet: Sheet1
Model	Bezier IML	LBF (Bezier)	Exp (LBF)	Choice (Bezier)	Model Probability
1:full (xxxx)	-928492	-171260	0	2	0
2:unidirectional (x0xx)	-973897	-216664	0	3	0
3:unidirectional (xx0x)	-757232	0	1	1 (best)	1
4:panmictic (x)	-1.67299e+06	-915756	0	4	0
>Number pp	-757232	Denominator-->	1
Generation time	1
Subsitution rate	1e-05
Best Model = Model 3 (xx0x)	Pop1=Orinoco	Pop2=Cucui
Cucui→Ori (100,00%)		Mean	Median	2,5%HPD	97,5%HPD
Theta 1	Q1	3.805	3.816	3.632	4.016
Theta 2	Q2	3.716	3.736	3.488	3.92
M pop 1 → 2	m1>2	---	---	---	---
M pop 2 → 1	m2>1	1.293	1.285	0.88	1.73
Ne Cucui	NeCucui	95125	95400	90800	100400
Ne Orinoco	NeOri	92900	93400	87200	98000
Effective migrants – Nm (Ori→Cucui)	Nem1>2	---	---	---	---
Effective migrants – Nm (Cucui→Ori)	Nem2>1	4.80479	4.80076	3.06944	6.7816
