# Supplementary material for: Phylogeography and population genetic structure of the cardinal tetra (Paracheirodon axelrodi) in the Orinoco basin and Negro River (Amazon basin): evaluating connectivity and historical patterns of diversification
Source: PeerJ. 2023 Jun 8;11:e15117. doi: 10.7717/peerj.15117 (PMC10257900; doi:10.7717/peerj.15117)
Supplement: Supplemental Information 6 [file peerj-11-15117-s006.xlsx]

## Sheet: Sheet1
Model	Bezier IML	LBF (Bezier)	Exp (LBF)	Choice (Bezier)	Model Probability
1:full (xxxx)	-485580	-107402	0	2	0
2:unidirectional (x0xx)	-378178	0	1	1 (best)	1
3:unidirectional (xx0x)	-530839	-152661	0	3	0
4:panmictic (x)	-485580	-107402	0	4	0
>Number pp	-378178	Denominator-->	1
Generation time	1
Subsitution rate	1e-05
Best Model = Model 2 (x0xx)	Pop1=Cucui	Pop2=Negro
Cucui→Negro (100,00%)		Mean	Median	2,5%HPD	97,5%HPD
Theta 1	Q1	5.506	5.556	5.04	5.88
Theta 2	Q2	5.463	5.508	4.92	5.904
M pop 1 → 2	m1>2	1.193	1.185	0.87	1.51
M pop 2 → 1	m2>1	---	---	---	---
Ne Cucui	NeCucui	137650	138900	126000	147000
Ne Negro	NeNegro	136575	137700	123000	147600
Effective migrants - Nm (Cucui→Negro)	Nem1>2	6.56866	6.58386	4.3848	8.8788
Effective migrants – Nm (Negro→Cucui)	Nem2>1	---	---	---	---
