# Supplementary material for: Phylogeography and population genetic structure of the cardinal tetra (Paracheirodon axelrodi) in the Orinoco basin and Negro River (Amazon basin): evaluating connectivity and historical patterns of diversification
Source: PeerJ. 2023 Jun 8;11:e15117. doi: 10.7717/peerj.15117 (PMC10257900; doi:10.7717/peerj.15117)
Supplement: Supplemental Information 7 [file peerj-11-15117-s007.xlsx]

## Sheet: Sheet1
Model	Bezier IML	LBF (Bezier)	Exp (LBF)	Choice (Bezier)	Model Probability
1:full (xxxx)	-737775	-24315	0	2	0
2:unidirectional (x0xx)	-747384	-33924.3	0	3	0
3:unidirectional (xx0x)	-713460	0	1	1 (best)	1
4:panmictic (x)	-1.15921e+06	-445749	0	4	0
>Number pp	-713460	Denominator-->	1
Generation time	1
Subsitution rate	1e-05
Best Model = Model 3 (xx0x)	Pop1=Orinoco	Pop2=Negro
Negro→Ori (100,00%)		Mean	Median	2,5%HPD	97,5%HPD
Theta 1	Q1	3.733	3.752	3.44	4
Theta 2	Q2	3.769	3.8	3.28	4.224
M pop 1 → 2	m1>2	---	---	---	---
M pop 2 → 1	m2>1	1.172	1.185	0.888	1.428
Ne Orinoco	NeOri	93325	93800	86000	100000
Ne Negro	NeAmaz	94225	95000	82000	105600
Effective migrants – Nm (Ori→Negro)	Nem1>2	---	---	---	---
Effective migrants – Nm (Negro→Ori)	Nem2>1	4.41727	4.503	2.91264	6.03187
