# Supplementary material for: Phylogeography and population genetic structure of the cardinal tetra (Paracheirodon axelrodi) in the Orinoco basin and Negro River (Amazon basin): evaluating connectivity and historical patterns of diversification
Source: PeerJ. 2023 Jun 8;11:e15117. doi: 10.7717/peerj.15117 (PMC10257900; doi:10.7717/peerj.15117)
Supplement: Supplemental Information 8 [file peerj-11-15117-s008.xlsx]

## Sheet: Hoja1
	Sample ID	Location	Sampling year	Coordinate	SSRs	COI/MYH6 sequence code on GenBank	COI GenBank accession number	MYH6 GenBank accession number	Tissue/DNA sample depositary
Gv01	1 GV	Guaviare -Río Guaviare	2013	N2°33’48.35” W72°40’49.85”	X				Laboratorio de Ecología Molecular de Vertebrados Acuáticos -LEMVA UNIANDES
Gv02	2 GV (59)	Guaviare -Río Guaviare	2013	N2°33’48.35” W72°40’49.85”	X				Laboratorio de Ecología Molecular de Vertebrados Acuáticos -LEMVA UNIANDES
Gv03	3 GV (60)	Guaviare -Río Guaviare	2013	N2°33’48.35” W72°40’49.85”	X				Laboratorio de Ecología Molecular de Vertebrados Acuáticos -LEMVA UNIANDES
Gv04	4 GV (61)	Guaviare -Río Guaviare	2013	N2°33’48.35” W72°40’49.85”	X				Laboratorio de Ecología Molecular de Vertebrados Acuáticos -LEMVA UNIANDES
Gv05	5 GV (62)	Guaviare -Río Guaviare	2013	N2°33’48.35” W72°40’49.85”	X				Laboratorio de Ecología Molecular de Vertebrados Acuáticos -LEMVA UNIANDES
Gv06	6 GV (63)	Guaviare -Río Guaviare	2013	N2°33’48.35” W72°40’49.85”	X				Laboratorio de Ecología Molecular de Vertebrados Acuáticos -LEMVA UNIANDES
Gv07	7 GV (64)	Guaviare -Río Guaviare	2013	N2°33’48.35” W72°40’49.85”	X				Laboratorio de Ecología Molecular de Vertebrados Acuáticos -LEMVA UNIANDES
Gv08	8 GV (65)	Guaviare -Río Guaviare	2013	N2°33’48.35” W72°40’49.85”	X				Laboratorio de Ecología Molecular de Vertebrados Acuáticos -LEMVA UNIANDES
Gv09	9 GV (66)	Guaviare -Río Guaviare	2013	N2°33’48.35” W72°40’49.85”	X	9bAxGV	MG384564	MG384576	Laboratorio de Ecología Molecular de Vertebrados Acuáticos -LEMVA UNIANDES
Gv10	10 GV (67)	Guaviare -Río Guaviare	2013	N2°33’48.35” W72°40’49.85”	X	10bAxGV	MG384565	MG384577	Laboratorio de Ecología Molecular de Vertebrados Acuáticos -LEMVA UNIANDES
Gv11	11 GV (68)	Guaviare -Río Guaviare	2013	N2°33’48.35” W72°40’49.85”	X	11bAxGV	MG384566	MG384578	Laboratorio de Ecología Molecular de Vertebrados Acuáticos -LEMVA UNIANDES
Gv12	12 GV	Guaviare -Río Guaviare	2013	N2°33’48.35” W72°40’49.85”	X	12bAxGV	MG384567	MG384579	Laboratorio de Ecología Molecular de Vertebrados Acuáticos -LEMVA UNIANDES
Gv13	14 GV	Guaviare -Río Guaviare	2013	N2°33’48.35” W72°40’49.85”	X				Laboratorio de Ecología Molecular de Vertebrados Acuáticos -LEMVA UNIANDES
Gv14	16 GV	Guaviare -Río Guaviare	2013	N2°33’48.35” W72°40’49.85”	X				Laboratorio de Ecología Molecular de Vertebrados Acuáticos -LEMVA UNIANDES
Gv15	18 GV	Guaviare -Río Guaviare	2013	N2°33’48.35” W72°40’49.85”	X				Laboratorio de Ecología Molecular de Vertebrados Acuáticos -LEMVA UNIANDES
Gv16	19 GV	Guaviare -Río Guaviare	2013	N2°33’48.35” W72°40’49.85”	X				Laboratorio de Ecología Molecular de Vertebrados Acuáticos -LEMVA UNIANDES
Gv17	20 GV	Guaviare -Río Guaviare	2013	N2°33’48.35” W72°40’49.85”	X				Laboratorio de Ecología Molecular de Vertebrados Acuáticos -LEMVA UNIANDES
Gv18	21 GV	Guaviare -Río Guaviare	2013	N2°33’48.35” W72°40’49.85”	X				Laboratorio de Ecología Molecular de Vertebrados Acuáticos -LEMVA UNIANDES
Gv19	22 GV	Guaviare -Río Guaviare	2013	N2°33’48.35” W72°40’49.85”	X				Laboratorio de Ecología Molecular de Vertebrados Acuáticos -LEMVA UNIANDES
Gv20	23 GV	Guaviare -Río Guaviare	2013	N2°33’48.35” W72°40’49.85”	X				Laboratorio de Ecología Molecular de Vertebrados Acuáticos -LEMVA UNIANDES
Car01	3 CAR	Puerto Carreño - Río Orinoco	2013	N6°9’28.69” W67°33’0.94”	X				Laboratorio de Ecología Molecular de Vertebrados Acuáticos -LEMVA UNIANDES
Car02	5 CAR	Puerto Carreño - Río Orinoco	2013	N6°9’28.69” W67°33’0.94”	X				Laboratorio de Ecología Molecular de Vertebrados Acuáticos -LEMVA UNIANDES
Car03	9 CAR (89)	Puerto Carreño - Río Orinoco	2013	N6°9’28.69” W67°33’0.94”	X				Laboratorio de Ecología Molecular de Vertebrados Acuáticos -LEMVA UNIANDES
Car04	10 CAR (90)	Puerto Carreño - Río Orinoco	2013	N6°9’28.69” W67°33’0.94”	X				Laboratorio de Ecología Molecular de Vertebrados Acuáticos -LEMVA UNIANDES
Car05	11 CAR (91)	Puerto Carreño - Río Orinoco	2013	N6°9’28.69” W67°33’0.94”	X				Laboratorio de Ecología Molecular de Vertebrados Acuáticos -LEMVA UNIANDES
Car06	12 CAR (92)	Puerto Carreño - Río Orinoco	2013	N6°9’28.69” W67°33’0.94”	X				Laboratorio de Ecología Molecular de Vertebrados Acuáticos -LEMVA UNIANDES
Car07	13 CAR (93)	Puerto Carreño - Río Orinoco	2013	N6°9’28.69” W67°33’0.94”	X				Laboratorio de Ecología Molecular de Vertebrados Acuáticos -LEMVA UNIANDES
Car08	14 CAR (94)	Puerto Carreño - Río Orinoco	2013	N6°9’28.69” W67°33’0.94”	X				Laboratorio de Ecología Molecular de Vertebrados Acuáticos -LEMVA UNIANDES
Car09	15 CAR (95)	Puerto Carreño - Río Orinoco	2013	N6°9’28.69” W67°33’0.94”	X				Laboratorio de Ecología Molecular de Vertebrados Acuáticos -LEMVA UNIANDES
Car10	16 CAR (96)	Puerto Carreño - Río Orinoco	2013	N6°9’28.69” W67°33’0.94”	X				Laboratorio de Ecología Molecular de Vertebrados Acuáticos -LEMVA UNIANDES
Car11	17 CAR (97)	Puerto Carreño - Río Orinoco	2013	N6°9’28.69” W67°33’0.94”	X				Laboratorio de Ecología Molecular de Vertebrados Acuáticos -LEMVA UNIANDES
Car12	18 CAR (98)	Puerto Carreño - Río Orinoco	2013	N6°9’28.69” W67°33’0.94”	X				Laboratorio de Ecología Molecular de Vertebrados Acuáticos -LEMVA UNIANDES
Car13	19 CAR	Puerto Carreño - Río Orinoco	2013	N6°9’28.69” W67°33’0.94”	X	8bAxCAR	MG384573	MG384593	Laboratorio de Ecología Molecular de Vertebrados Acuáticos -LEMVA UNIANDES
Car14	20 CAR	Puerto Carreño - Río Orinoco	2013	N6°9’28.69” W67°33’0.94”	X	9bAxCAR	MG384574	MG384594	Laboratorio de Ecología Molecular de Vertebrados Acuáticos -LEMVA UNIANDES
Car15	24 CAR	Puerto Carreño - Río Orinoco	2013	N6°9’28.69” W67°33’0.94”	X	10bAxCAR	MG384575	MG384595	Laboratorio de Ecología Molecular de Vertebrados Acuáticos -LEMVA UNIANDES
Car16	25 CAR	Puerto Carreño - Río Orinoco	2013	N6°9’28.69” W67°33’0.94”	X				Laboratorio de Ecología Molecular de Vertebrados Acuáticos -LEMVA UNIANDES
Car17	26 CAR	Puerto Carreño - Río Orinoco	2013	N6°9’28.69” W67°33’0.94”	X				Laboratorio de Ecología Molecular de Vertebrados Acuáticos -LEMVA UNIANDES
Car18	27 CAR	Puerto Carreño - Río Orinoco	2013	N6°9’28.69” W67°33’0.94”	X				Laboratorio de Ecología Molecular de Vertebrados Acuáticos -LEMVA UNIANDES
Car19	28 CAR	Puerto Carreño - Río Orinoco	2013	N6°9’28.69” W67°33’0.94”	X				Laboratorio de Ecología Molecular de Vertebrados Acuáticos -LEMVA UNIANDES
Car20	29 CAR	Puerto Carreño - Río Orinoco	2013	N6°9’28.69” W67°33’0.94”	X				Laboratorio de Ecología Molecular de Vertebrados Acuáticos -LEMVA UNIANDES
Pg01	2 PG	Puerto Gaitán - Río Meta (Orinoco)	2013	N4°18’23.75” W72°4’17.21”	X				Laboratorio de Ecología Molecular de Vertebrados Acuáticos -LEMVA UNIANDES
Pg02	3 PG	Puerto Gaitán - Río Meta (Orinoco)	2013	N4°18’23.75” W72°4’17.21”	X				Laboratorio de Ecología Molecular de Vertebrados Acuáticos -LEMVA UNIANDES
Pg03	4 PG	Puerto Gaitán - Río Meta (Orinoco)	2013	N4°18’23.75” W72°4’17.21”	X				Laboratorio de Ecología Molecular de Vertebrados Acuáticos -LEMVA UNIANDES
Pg04	6 PG	Puerto Gaitán - Río Meta (Orinoco)	2013	N4°18’23.75” W72°4’17.21”	X				Laboratorio de Ecología Molecular de Vertebrados Acuáticos -LEMVA UNIANDES
Pg05	7 PG	Puerto Gaitán - Río Meta (Orinoco)	2013	N4°18’23.75” W72°4’17.21”	X				Laboratorio de Ecología Molecular de Vertebrados Acuáticos -LEMVA UNIANDES
Pg06	8 PG	Puerto Gaitán - Río Meta (Orinoco)	2013	N4°18’23.75” W72°4’17.21”	X	8AxPG	MG384570	MG384580	Laboratorio de Ecología Molecular de Vertebrados Acuáticos -LEMVA UNIANDES
Pg07	9 PG (459)	Puerto Gaitán - Río Meta (Orinoco)	2013	N4°18’23.75” W72°4’17.21”	X				Laboratorio de Ecología Molecular de Vertebrados Acuáticos -LEMVA UNIANDES
Pg08	10 PG	Puerto Gaitán - Río Meta (Orinoco)	2013	N4°18’23.75” W72°4’17.21”	X				Laboratorio de Ecología Molecular de Vertebrados Acuáticos -LEMVA UNIANDES
Pg09	13 PG	Puerto Gaitán - Río Meta (Orinoco)	2013	N4°18’23.75” W72°4’17.21”	X				Laboratorio de Ecología Molecular de Vertebrados Acuáticos -LEMVA UNIANDES
Pg10	14 PG	Puerto Gaitán - Río Meta (Orinoco)	2013	N4°18’23.75” W72°4’17.21”	X	14AxPG	MG384571	MG384581	Laboratorio de Ecología Molecular de Vertebrados Acuáticos -LEMVA UNIANDES
Pg11	15PG	Puerto Gaitán - Río Meta (Orinoco)	2013	N4°18’23.75” W72°4’17.21”	X				Laboratorio de Ecología Molecular de Vertebrados Acuáticos -LEMVA UNIANDES
Pg12	16PG	Puerto Gaitán - Río Meta (Orinoco)	2013	N4°18’23.75” W72°4’17.21”	X				Laboratorio de Ecología Molecular de Vertebrados Acuáticos -LEMVA UNIANDES
Pg13	17PG	Puerto Gaitán - Río Meta (Orinoco)	2013	N4°18’23.75” W72°4’17.21”	X				Laboratorio de Ecología Molecular de Vertebrados Acuáticos -LEMVA UNIANDES
Pg14	18PG	Puerto Gaitán - Río Meta (Orinoco)	2013	N4°18’23.75” W72°4’17.21”	X				Laboratorio de Ecología Molecular de Vertebrados Acuáticos -LEMVA UNIANDES
Pg15	22 PG (454)	Puerto Gaitán - Río Meta (Orinoco)	2013	N4°18’23.75” W72°4’17.21”	X	19AxPG	MG384572	MG384582	Laboratorio de Ecología Molecular de Vertebrados Acuáticos -LEMVA UNIANDES
Pg16	23 PG (460)	Puerto Gaitán - Río Meta (Orinoco)	2013	N4°18’23.75” W72°4’17.21”	X				Laboratorio de Ecología Molecular de Vertebrados Acuáticos -LEMVA UNIANDES
Pg17	24 PG (458)	Puerto Gaitán - Río Meta (Orinoco)	2013	N4°18’23.75” W72°4’17.21”	X				Laboratorio de Ecología Molecular de Vertebrados Acuáticos -LEMVA UNIANDES
Pg18	25 PG (457)	Puerto Gaitán - Río Meta (Orinoco)	2013	N4°18’23.75” W72°4’17.21”	X				Laboratorio de Ecología Molecular de Vertebrados Acuáticos -LEMVA UNIANDES
Pg19	26 PG (456)	Puerto Gaitán - Río Meta (Orinoco)	2013	N4°18’23.75” W72°4’17.21”	X				Laboratorio de Ecología Molecular de Vertebrados Acuáticos -LEMVA UNIANDES
Pg20	27 PG (455)	Puerto Gaitán - Río Meta (Orinoco)	2013	N4°18’23.75” W72°4’17.21”	X				Laboratorio de Ecología Molecular de Vertebrados Acuáticos -LEMVA UNIANDES
Pg21	28 PG (453)	Puerto Gaitán - Río Meta (Orinoco)	2013	N4°18’23.75” W72°4’17.21”	X				Laboratorio de Ecología Molecular de Vertebrados Acuáticos -LEMVA UNIANDES
Ini01	17 INI	Puerto Inirida -Río Inírida	2013	N3°50’35.54” W67°58’37.72”	X				Laboratorio de Ecología Molecular de Vertebrados Acuáticos -LEMVA UNIANDES
Ini02	18 INI	Puerto Inirida -Río Inírida	2013	N3°50’35.54” W67°58’37.72”	X				Laboratorio de Ecología Molecular de Vertebrados Acuáticos -LEMVA UNIANDES
Ini03	19 INI	Puerto Inirida -Río Inírida	2013	N3°50’35.54” W67°58’37.72”	X				Laboratorio de Ecología Molecular de Vertebrados Acuáticos -LEMVA UNIANDES
Ini04	20 INI	Puerto Inirida -Río Inírida	2013	N3°50’35.54” W67°58’37.72”	X				Laboratorio de Ecología Molecular de Vertebrados Acuáticos -LEMVA UNIANDES
Ini05	21 INI	Puerto Inirida -Río Inírida	2013	N3°50’35.54” W67°58’37.72”	X				Laboratorio de Ecología Molecular de Vertebrados Acuáticos -LEMVA UNIANDES
Ini06	22 INI	Puerto Inirida -Río Inírida	2013	N3°50’35.54” W67°58’37.72”	X				Laboratorio de Ecología Molecular de Vertebrados Acuáticos -LEMVA UNIANDES
Ini07	23 INI	Puerto Inirida -Río Inírida	2013	N3°50’35.54” W67°58’37.72”	X				Laboratorio de Ecología Molecular de Vertebrados Acuáticos -LEMVA UNIANDES
Ini08	24 INI	Puerto Inirida -Río Inírida	2013	N3°50’35.54” W67°58’37.72”	X	24AxIN	MG384568	MG384583	Laboratorio de Ecología Molecular de Vertebrados Acuáticos -LEMVA UNIANDES
Ini09	25 INI	Puerto Inirida -Río Inírida	2013	N3°50’35.54” W67°58’37.72”	X				Laboratorio de Ecología Molecular de Vertebrados Acuáticos -LEMVA UNIANDES
Ini10	26 INI	Puerto Inirida -Río Inírida	2013	N3°50’35.54” W67°58’37.72”	X				Laboratorio de Ecología Molecular de Vertebrados Acuáticos -LEMVA UNIANDES
Ini11	27 INI	Puerto Inirida -Río Inírida	2013	N3°50’35.54” W67°58’37.72”	X				Laboratorio de Ecología Molecular de Vertebrados Acuáticos -LEMVA UNIANDES
Ini12	28 INI	Puerto Inirida -Río Inírida	2013	N3°50’35.54” W67°58’37.72”	X				Laboratorio de Ecología Molecular de Vertebrados Acuáticos -LEMVA UNIANDES
Ini13	29 INI	Puerto Inirida -Río Inírida	2013	N3°50’35.54” W67°58’37.72”	X				Laboratorio de Ecología Molecular de Vertebrados Acuáticos -LEMVA UNIANDES
Ini14	30 INI	Puerto Inirida -Río Inírida	2013	N3°50’35.54” W67°58’37.72”	X				Laboratorio de Ecología Molecular de Vertebrados Acuáticos -LEMVA UNIANDES
Ini15	31 INI	Puerto Inirida -Río Inírida	2013	N3°50’35.54” W67°58’37.72”	X				Laboratorio de Ecología Molecular de Vertebrados Acuáticos -LEMVA UNIANDES
Ini16	32 INI	Puerto Inirida -Río Inírida	2013	N3°50’35.54” W67°58’37.72”	X				Laboratorio de Ecología Molecular de Vertebrados Acuáticos -LEMVA UNIANDES
Ini17	40 INI	Puerto Inirida -Río Inírida	2013	N3°50’35.54” W67°58’37.72”	X	40AxIN	MG384569	MG384584	Laboratorio de Ecología Molecular de Vertebrados Acuáticos -LEMVA UNIANDES
Ini18	41 INI	Puerto Inirida -Río Inírida	2013	N3°50’35.54” W67°58’37.72”	X				Laboratorio de Ecología Molecular de Vertebrados Acuáticos -LEMVA UNIANDES
Ini19	42 INI	Puerto Inirida -Río Inírida	2013	N3°50’35.54” W67°58’37.72”	X				Laboratorio de Ecología Molecular de Vertebrados Acuáticos -LEMVA UNIANDES
Ini20	43 INI	Puerto Inirida -Río Inírida	2013	N3°50’35.54” W67°58’37.72”	X				Laboratorio de Ecología Molecular de Vertebrados Acuáticos -LEMVA UNIANDES
Ini21	44 INI	Puerto Inirida -Río Inírida	2013	N3°50’35.54” W67°58’37.72”	X				Laboratorio de Ecología Molecular de Vertebrados Acuáticos -LEMVA UNIANDES
Bar01	26 BAR	Barcelos - Rio Caurés-Ig. Cajarazinho	2013	S0°19'47" W62°38'12"	X				Laboratorio de Ecología Molecular de Vertebrados Acuáticos -LEMVA UNIANDES
Bar02	27 BAR	Barcelos - Rio Caurés-Ig. Cajarazinho	2013	S0°19'47" W62°38'12"	X				Laboratorio de Ecología Molecular de Vertebrados Acuáticos -LEMVA UNIANDES
Bar03	28 BAR	Barcelos - Rio Caurés-Ig. Cajarazinho	2013	S0°19'47" W62°38'12"	X				Laboratorio de Ecología Molecular de Vertebrados Acuáticos -LEMVA UNIANDES
Bar04	29 BAR	Barcelos - Rio Caurés-Ig. Cajarazinho	2013	S0°19'47" W62°38'12"	X				Laboratorio de Ecología Molecular de Vertebrados Acuáticos -LEMVA UNIANDES
Bar05	30 BAR	Barcelos - Rio Caurés-Ig. Cajarazinho	2013	S0°19'47" W62°38'12"	X				Laboratorio de Ecología Molecular de Vertebrados Acuáticos -LEMVA UNIANDES
Bar06	31 BAR	Barcelos - Rio Caurés-Ig. Cajarazinho	2013	S0°19'47" W62°38'12"	X	6AxBAR	MG384556	MG384592	Laboratorio de Ecología Molecular de Vertebrados Acuáticos -LEMVA UNIANDES
Bar07	32 BAR	Barcelos - Rio Caurés-Ig. Cajarazinho	2013	S0°19'47" W62°38'12"	X	7AxBAR	MG384557	MG384591	Laboratorio de Ecología Molecular de Vertebrados Acuáticos -LEMVA UNIANDES
Bar08	33 BAR	Barcelos - Rio Caurés-Ig. Cajarazinho	2013	S0°19'47" W62°38'12"	X				Laboratorio de Ecología Molecular de Vertebrados Acuáticos -LEMVA UNIANDES
Bar09	34 BAR	Barcelos - Rio Caurés-Ig. Cajarazinho	2013	S0°19'47" W62°38'12"	X				Laboratorio de Ecología Molecular de Vertebrados Acuáticos -LEMVA UNIANDES
Bar10	35 BAR	Barcelos - Rio Caurés-Ig. Cajarazinho	2013	S0°19'47" W62°38'12"	X				Laboratorio de Ecología Molecular de Vertebrados Acuáticos -LEMVA UNIANDES
Bar11	36 BAR	Barcelos - Rio Caurés-Ig. Cajarazinho	2013	S0°19'47" W62°38'12"	X				Laboratorio de Ecología Molecular de Vertebrados Acuáticos -LEMVA UNIANDES
Bar12	37 BAR	Barcelos - Rio Caurés-Ig. Cajarazinho	2013	S0°19'47" W62°38'12"	X				Laboratorio de Ecología Molecular de Vertebrados Acuáticos -LEMVA UNIANDES
Bar13	38 BAR	Barcelos - Rio Caurés-Ig. Cajarazinho	2013	S0°19'47" W62°38'12"	X				Laboratorio de Ecología Molecular de Vertebrados Acuáticos -LEMVA UNIANDES
Bar14	39 BAR	Barcelos - Rio Caurés-Ig. Cajarazinho	2013	S0°19'47" W62°38'12"	X				Laboratorio de Ecología Molecular de Vertebrados Acuáticos -LEMVA UNIANDES
Bar15	40 BAR	Barcelos - Rio Caurés-Ig. Cajarazinho	2013	S0°19'47" W62°38'12"	X				Laboratorio de Ecología Molecular de Vertebrados Acuáticos -LEMVA UNIANDES
Bar16	42 BAR	Barcelos - Rio Caurés-Ig. Cajarazinho	2013	S0°19'47" W62°38'12"	X				Laboratorio de Ecología Molecular de Vertebrados Acuáticos -LEMVA UNIANDES
Bar17	43 BAR	Barcelos - Rio Caurés-Ig. Cajarazinho	2013	S0°19'47" W62°38'12"	X				Laboratorio de Ecología Molecular de Vertebrados Acuáticos -LEMVA UNIANDES
Bar18	44 BAR	Barcelos - Rio Caurés-Ig. Cajarazinho	2013	S0°19'47" W62°38'12"	X				Laboratorio de Ecología Molecular de Vertebrados Acuáticos -LEMVA UNIANDES
Bar19	45 BAR	Barcelos - Rio Caurés-Ig. Cajarazinho	2013	S0°19'47" W62°38'12"	X				Laboratorio de Ecología Molecular de Vertebrados Acuáticos -LEMVA UNIANDES
Bar20	46 BAR	Barcelos - Rio Caurés-Ig. Cajarazinho	2013	S0°19'47" W62°38'12"	X				Laboratorio de Ecología Molecular de Vertebrados Acuáticos -LEMVA UNIANDES
Si01	1 SI	Santa Isabel - Río Têa	2014	S0°33'55" W65°15'29.5"	X				Laboratorio de Ecología Molecular de Vertebrados Acuáticos -LEMVA UNIANDES
Si02	2 SI	Santa Isabel - Río Têa	2014	S0°33'55" W65°15'29.5"	X	2AxSI	MG384561	MG384588	Laboratorio de Ecología Molecular de Vertebrados Acuáticos -LEMVA UNIANDES
Si03	3 SI	Santa Isabel - Río Têa	2014	S0°33'55" W65°15'29.5"	X	3AxSI	MG384562	MG384589	Laboratorio de Ecología Molecular de Vertebrados Acuáticos -LEMVA UNIANDES
Si04	4 SI	Santa Isabel - Río Têa	2014	S0°33'55" W65°15'29.5"	X	4AxSI	MG384563	MG384590	Laboratorio de Ecología Molecular de Vertebrados Acuáticos -LEMVA UNIANDES
Si05	5 SI	Santa Isabel - Río Têa	2014	S0°33'55" W65°15'29.5"	X				Laboratorio de Ecología Molecular de Vertebrados Acuáticos -LEMVA UNIANDES
Si06	6 SI	Santa Isabel - Río Têa	2014	S0°33'55" W65°15'29.5"	X				Laboratorio de Ecología Molecular de Vertebrados Acuáticos -LEMVA UNIANDES
Si07	7 SI	Santa Isabel - Río Têa	2014	S0°33'55" W65°15'29.5"	X				Laboratorio de Ecología Molecular de Vertebrados Acuáticos -LEMVA UNIANDES
Si08	8 SI	Santa Isabel - Río Têa	2014	S0°33'55" W65°15'29.5"	X				Laboratorio de Ecología Molecular de Vertebrados Acuáticos -LEMVA UNIANDES
Si09	9 SI	Santa Isabel - Río Têa	2014	S0°33'55" W65°15'29.5"	X				Laboratorio de Ecología Molecular de Vertebrados Acuáticos -LEMVA UNIANDES
Si10	10 SI	Santa Isabel - Río Têa	2014	S0°33'55" W65°15'29.5"	X				Laboratorio de Ecología Molecular de Vertebrados Acuáticos -LEMVA UNIANDES
Si11	11 SI	Santa Isabel - Río Têa	2014	S0°33'55" W65°15'29.5"	X				Laboratorio de Ecología Molecular de Vertebrados Acuáticos -LEMVA UNIANDES
Si12	12 SI	Santa Isabel - Río Têa	2014	S0°33'55" W65°15'29.5"	X				Laboratorio de Ecología Molecular de Vertebrados Acuáticos -LEMVA UNIANDES
Si13	13 SI	Santa Isabel - Río Têa	2014	S0°33'55" W65°15'29.5"	X				Laboratorio de Ecología Molecular de Vertebrados Acuáticos -LEMVA UNIANDES
Si14	14 SI	Santa Isabel - Río Têa	2014	S0°33'55" W65°15'29.5"	X				Laboratorio de Ecología Molecular de Vertebrados Acuáticos -LEMVA UNIANDES
Si15	15 SI	Santa Isabel - Río Têa	2014	S0°33'55" W65°15'29.5"	X				Laboratorio de Ecología Molecular de Vertebrados Acuáticos -LEMVA UNIANDES
Si16	16 SI	Santa Isabel - Río Têa	2014	S0°33'55" W65°15'29.5"	X				Laboratorio de Ecología Molecular de Vertebrados Acuáticos -LEMVA UNIANDES
Si17	17 SI	Santa Isabel - Río Têa	2014	S0°33'55" W65°15'29.5"	X				Laboratorio de Ecología Molecular de Vertebrados Acuáticos -LEMVA UNIANDES
Si18	2 si (JP)	Santa Isabel - Río Têa	2014	S0°33'55" W65°15'29.5"	X				Laboratorio de Ecología Molecular de Vertebrados Acuáticos -LEMVA UNIANDES
Si19	3 si (JP)	Santa Isabel - Río Têa	2014	S0°33'55" W65°15'29.5"	X				Laboratorio de Ecología Molecular de Vertebrados Acuáticos -LEMVA UNIANDES
Si20	4 si (JP)	Santa Isabel - Río Têa	2014	S0°33'55" W65°15'29.5"	X				Laboratorio de Ecología Molecular de Vertebrados Acuáticos -LEMVA UNIANDES
SG01	422 SG	São Gabriel da Cachoeira - Ducubixi	2007	S0°0'39" W67°15'34.7"	X				Laboratório de Genética Animal - LGA - INPA
SG02	423 SG	São Gabriel da Cachoeira - Ducubixi	2007	S0°0'39" W67°15'34.7"	X				Laboratório de Genética Animal - LGA - INPA
SG03	424 SG	São Gabriel da Cachoeira - Ducubixi	2007	S0°0'39" W67°15'34.7"	X				Laboratório de Genética Animal - LGA - INPA
SG04	425 SG	São Gabriel da Cachoeira - Ducubixi	2007	S0°0'39" W67°15'34.7"	X				Laboratório de Genética Animal - LGA - INPA
SG05	426 SG	São Gabriel da Cachoeira - Ducubixi	2007	S0°0'39" W67°15'34.7"	X				Laboratório de Genética Animal - LGA - INPA
SG06	427 SG	São Gabriel da Cachoeira - Ducubixi	2007	S0°0'39" W67°15'34.7"	X				Laboratório de Genética Animal - LGA - INPA
SG07	428 SG	São Gabriel da Cachoeira - Ducubixi	2007	S0°0'39" W67°15'34.7"	X				Laboratório de Genética Animal - LGA - INPA
SG08	429 SG	São Gabriel da Cachoeira - Ducubixi	2007	S0°0'39" W67°15'34.7"	X				Laboratório de Genética Animal - LGA - INPA
SG09	430 SG	São Gabriel da Cachoeira - Ducubixi	2007	S0°0'39" W67°15'34.7"	X				Laboratório de Genética Animal - LGA - INPA
SG10	431 SG	São Gabriel da Cachoeira - Ducubixi	2007	S0°0'39" W67°15'34.7"	X				Laboratório de Genética Animal - LGA - INPA
SG11	500 SG	São Gabriel da Cachoeira - Ducubixi	2007	S0°0'39" W67°15'34.7"	X				Laboratório de Genética Animal - LGA - INPA
SG12	501 SG	São Gabriel da Cachoeira - Ducubixi	2007	S0°0'39" W67°15'34.7"	X				Laboratório de Genética Animal - LGA - INPA
SG13	502 SG	São Gabriel da Cachoeira - Ducubixi	2007	S0°0'39" W67°15'34.7"	X				Laboratório de Genética Animal - LGA - INPA
SG14	503 SG	São Gabriel da Cachoeira - Ducubixi	2007	S0°0'39" W67°15'34.7"	X				Laboratório de Genética Animal - LGA - INPA
SG15	506 SG	São Gabriel da Cachoeira - Ducubixi	2007	S0°0'39" W67°15'34.7"	X				Laboratório de Genética Animal - LGA - INPA
SG16	507 SG	São Gabriel da Cachoeira - Ducubixi	2007	S0°0'39" W67°15'34.7"	X				Laboratório de Genética Animal - LGA - INPA
SG17	508 SG	São Gabriel da Cachoeira - Ducubixi	2007	S0°0'39" W67°15'34.7"	X				Laboratório de Genética Animal - LGA - INPA
SG18	510 SG	São Gabriel da Cachoeira - Ducubixi	2007	S0°0'39" W67°15'34.7"	X				Laboratório de Genética Animal - LGA - INPA
SG19	511 SG	São Gabriel da Cachoeira - Ducubixi	2007	S0°0'39" W67°15'34.7"	X				Laboratório de Genética Animal - LGA - INPA
SG20	512 SG	São Gabriel da Cachoeira - Ducubixi	2007	S0°0'39" W67°15'34.7"	X				Laboratório de Genética Animal - LGA - INPA
Cuc01	1 CUC	Cucui - lake system	2014	N1°1’20.71” W66°47’32.78”	X	1Axcuc	MG384558	MG384585	Laboratorio de Ecología Molecular de Vertebrados Acuáticos -LEMVA UNIANDES
Cuc02	2 CUC	Cucui - lake system	2014	N1°1’20.71” W66°47’32.78”	X	2Axcuc	MG384559	MG384586	Laboratorio de Ecología Molecular de Vertebrados Acuáticos -LEMVA UNIANDES
Cuc03	3 CUC	Cucui - lake system	2014	N1°1’20.71” W66°47’32.78”	X	3Axcuc	MG384560	MG384587	Laboratorio de Ecología Molecular de Vertebrados Acuáticos -LEMVA UNIANDES
Cuc04	4 CUC	Cucui - lake system	2014	N1°1’20.71” W66°47’32.78”	X				Laboratorio de Ecología Molecular de Vertebrados Acuáticos -LEMVA UNIANDES
Cuc05	5 CUC	Cucui - lake system	2014	N1°1’20.71” W66°47’32.78”	X				Laboratorio de Ecología Molecular de Vertebrados Acuáticos -LEMVA UNIANDES
Cuc06	6 CUC	Cucui - lake system	2014	N1°1’20.71” W66°47’32.78”	X				Laboratorio de Ecología Molecular de Vertebrados Acuáticos -LEMVA UNIANDES
Cuc07	7 CUC	Cucui - lake system	2014	N1°1’20.71” W66°47’32.78”	X				Laboratorio de Ecología Molecular de Vertebrados Acuáticos -LEMVA UNIANDES
Cuc08	8 CUC	Cucui - lake system	2014	N1°1’20.71” W66°47’32.78”	X				Laboratorio de Ecología Molecular de Vertebrados Acuáticos -LEMVA UNIANDES
Cuc09	9 CUC	Cucui - lake system	2014	N1°1’20.71” W66°47’32.78”	X				Laboratorio de Ecología Molecular de Vertebrados Acuáticos -LEMVA UNIANDES
Cuc10	10 CUC	Cucui - lake system	2014	N1°1’20.71” W66°47’32.78”	X				Laboratorio de Ecología Molecular de Vertebrados Acuáticos -LEMVA UNIANDES
Cuc11	11 CUC	Cucui - lake system	2014	N1°1’20.71” W66°47’32.78”	X				Laboratorio de Ecología Molecular de Vertebrados Acuáticos -LEMVA UNIANDES
Cuc12	12 CUC	Cucui - lake system	2014	N1°1’20.71” W66°47’32.78”	X				Laboratorio de Ecología Molecular de Vertebrados Acuáticos -LEMVA UNIANDES
Cuc13	13 CUC	Cucui - lake system	2014	N1°1’20.71” W66°47’32.78”	X				Laboratorio de Ecología Molecular de Vertebrados Acuáticos -LEMVA UNIANDES
Cuc14	14 CUC	Cucui - lake system	2014	N1°1’20.71” W66°47’32.78”	X				Laboratorio de Ecología Molecular de Vertebrados Acuáticos -LEMVA UNIANDES
Cuc15	15 CUC	Cucui - lake system	2014	N1°1’20.71” W66°47’32.78”	X				Laboratorio de Ecología Molecular de Vertebrados Acuáticos -LEMVA UNIANDES
Cuc16	16 CUC	Cucui - lake system	2014	N1°1’20.71” W66°47’32.78”	X				Laboratorio de Ecología Molecular de Vertebrados Acuáticos -LEMVA UNIANDES
Cuc17	17 CUC	Cucui - lake system	2014	N1°1’20.71” W66°47’32.78”	X				Laboratorio de Ecología Molecular de Vertebrados Acuáticos -LEMVA UNIANDES
Cuc18	18 CUC	Cucui - lake system	2014	N1°1’20.71” W66°47’32.78”	X				Laboratorio de Ecología Molecular de Vertebrados Acuáticos -LEMVA UNIANDES
Cuc19	19 CUC	Cucui - lake system	2014	N1°1’20.71” W66°47’32.78”	X				Laboratorio de Ecología Molecular de Vertebrados Acuáticos -LEMVA UNIANDES
Cuc20	20 CUC	Cucui - lake system	2014	N1°1’20.71” W66°47’32.78”	X				Laboratorio de Ecología Molecular de Vertebrados Acuáticos -LEMVA UNIANDES
Cuc21	21 CUC	Cucui - lake system	2014	N1°1’20.71” W66°47’32.78”	X				Laboratorio de Ecología Molecular de Vertebrados Acuáticos -LEMVA UNIANDES
