# Supplementary material for: Phylogeography and population genetic structure of the cardinal tetra (Paracheirodon axelrodi) in the Orinoco basin and Negro River (Amazon basin): evaluating connectivity and historical patterns of diversification
Source: PeerJ. 2023 Jun 8;11:e15117. doi: 10.7717/peerj.15117 (PMC10257900; doi:10.7717/peerj.15117)
Supplement: Supplemental Information 12 [file peerj-11-15117-s012.xlsx]

## Sheet: Sheet1
			Pa 7		Pa 13		Pa 19		Pa 26		Pa 27		Pa 32		Pa 33		Pa 37
	Sample ID	Location	Allele 1	Allele 2	Allele 1	Allele 2	Allele 1	Allele 2	Allele 1	Allele 2	Allele 1	Allele 2	Allele 1	Allele 2	Allele 1	Allele 2	Allele 1	Allele 2
Gv01	1 GV	Guaviare	196	196	179	183	245	245	217	225	245	245	188	192	240	240	215	215
Gv02	2 GV (59)	Guaviare	182	196	179	183	245	245	199	245	245	245			232	236
Gv03	3 GV (60)	Guaviare	194	194	179	183	245	247	211	225	245	245	214	214	244	252	201	235
Gv04	4 GV (61)	Guaviare	196	196	179	183	245	247	211	225	247	247	272	282	240	240	215	215
Gv05	5 GV (62)	Guaviare	194	194	183	183	245	245	225	225	245	245	222	222	238	246	201	201
Gv06	6 GV (63)	Guaviare	180	194	183	183	247	249	211	211	245	245	200	200	238	238	215	217
Gv07	7 GV (64)	Guaviare	194	196	183	183	245	247	225	225	245	245	188	282	238	238	215	215
Gv08	8 GV (65)	Guaviare	194	198	179	179	241	247	217	217	247	247	248	278	240	240	211	215
Gv09	9 GV (66)	Guaviare	180	194	183	183	245	247	225	229	245	245	222	222	248	254	215	215
Gv10	10 GV (67)	Guaviare	194	200	183	183	247	249	213	225	245	245	236	238	238	246	211	215
Gv11	11 GV (68)	Guaviare	182	196	179	183	245	247	227	229	245	245	212	212	234	246	215	215
Gv12	12 GV	Guaviare	182	196	183	183	245	245	213	217	227	245	240	240	238	244	215	215
Gv13	14 GV	Guaviare	182	196	183	183	235	245	217	223	245	245	220	252	246	258	215	215
Gv14	16 GV	Guaviare	182	196	183	185	245	245	221	227	243	243	206	206	224	240	215	215
Gv15	18 GV	Guaviare	182	196	183	185	245	245	217	223	227	245	252	276	238	250	211	215
Gv16	19 GV	Guaviare	180	194	179	183	245	245	225	225	237	245	248	268	238	238	233	233
Gv17	20 GV	Guaviare	182	196	179	183	247	247	225	225	245	245	188	192	232	238	215	215
Gv18	21 GV	Guaviare	182	196	179	179			219	219	229	247	188	192	234	234
Gv19	22 GV	Guaviare	194	196	183	183			219	221	227	245	188	188	222	238
Gv20	23 GV	Guaviare	194	196	183	183	245	245	225	225	227	245	188	188	238	238	215	215
Car01	3 CAR	Puerto Carreño	196	196	185	187	235	235	217	223	247	247	188	198	236	244
Car02	5 CAR	Puerto Carreño	182	196	179	179	241	245	225	225	247	247			220	220	211	211
Car03	9 CAR (89)	Puerto Carreño	194	194			219	241	217	219	247	247			238	240	197	211
Car04	10 CAR (90)	Puerto Carreño	194	196	179	179	245	247	217	219	247	247	216	216	240	248	213	219
Car05	11 CAR (91)	Puerto Carreño	194	196	179	179			217	229	247	247	202	202	238	238	211	211
Car06	12 CAR (92)	Puerto Carreño	194	194	179	179	245	245	217	219	245	247	238	244	236	240	211	223
Car07	13 CAR (93)	Puerto Carreño	198	198	179	215	235	235	217	219	247	247	218	218	236	240	211	223
Car08	14 CAR (94)	Puerto Carreño	196	196	179	179	245	245	217	217	245	247	246	246	222	222	211	211
Car09	15 CAR (95)	Puerto Carreño	196	198	179	179	245	247	217	217	243	247	202	202	238	238	201	211
Car10	16 CAR (96)	Puerto Carreño	196	198	185	215	245	245	217	219	247	247			236	238	211	211
Car11	17 CAR (97)	Puerto Carreño	196	196	215	215	245	247	217	219	247	247			232	236	207	209
Car12	18 CAR (98)	Puerto Carreño	194	196	185	185	243	245	217	217	247	247	208	208	222	222	213	213
Car13	19 CAR	Puerto Carreño	196	198	179	183	245	245	217	217	247	247	188	188	232	240	211	211
Car14	20 CAR	Puerto Carreño	196	196	179	183	235	247	217	221	247	247			234	250	211	211
Car15	24 CAR	Puerto Carreño	196	198	181	181	235	241	217	223	247	247			234	234	207	215
Car16	25 CAR	Puerto Carreño	196	198	183	183	219	241	217	223	247	247	214	218	234	240
Car17	26 CAR	Puerto Carreño	196	198	185	215	243	243	195	217	247	247			230	232	207	225
Car18	27 CAR	Puerto Carreño	196	198	215	221	241	241	217	223	247	247	222	222	234	234	211	215
Car19	28 CAR	Puerto Carreño	196	196	193	215			217	217	247	247	188	188	234	234	211	211
Car20	29 CAR	Puerto Carreño	196	198	179	179	247	247	217	217	247	247	188	192	220	220	207	219
Pg01	2 PG	Puerto Gaitán	182	196	185	185			217	217	247	247	188	188	224	224	213	213
Pg02	3 PG	Puerto Gaitán	184	198	183	185	245	245	217	217	225	243	188	188	234	246	213	225
Pg03	4 PG	Puerto Gaitán	182	196	185	185	245	245	217	221	227	245	188	214	224	234	213	213
Pg04	6 PG	Puerto Gaitán	182	196	185	185	245	245	217	223	227	245	188	192	236	240	235	239
Pg05	7 PG	Puerto Gaitán	196	198	179	179	245	245	217	223	243	247	188	188	234	234	225	245
Pg06	8 PG	Puerto Gaitán	182	196	179	179	245	245	195	217	245	247	198	198	236	244	211	213
Pg07	9 PG (459)	Puerto Gaitán	194	194	185	185	245	245	217	217	237	245	206	206	224	224	217	217
Pg08	10 PG	Puerto Gaitán	194	194	183	185	245	245	217	223	243	245	188	202	234	236	213	217
Pg09	13 PG	Puerto Gaitán	196	196	185	185	245	245	217	223	245	245	188	210	224	234	211	223
Pg10	14 PG	Puerto Gaitán	182	196	185	185	245	245	217	217	245	245	188	188	236	248	213	213
Pg11	15PG	Puerto Gaitán	196	198	185	185	245	245	219	219	239	239	198	198	234	240	207	207
Pg12	16PG	Puerto Gaitán	182	196	183	185	245	245	221	227	243	243	206	206	240	254
Pg13	17PG	Puerto Gaitán	194	196	179	185			217	217	227	245	188	188	234	236	225	225
Pg14	18PG	Puerto Gaitán	196	196	171	185			217	223	245	245			220	220	227	227
Pg15	22 PG (454)	Puerto Gaitán	194	194	183	185	245	247	225	225	245	247	186	204	234	236	213	257
Pg16	23 PG (460)	Puerto Gaitán	196	204	179	183	245	245			243	245	188	192	234	234	213	245
Pg17	24 PG (458)	Puerto Gaitán	194	196	185	187	245	245	195	217	247	247	186	208	222	234	215	215
Pg18	25 PG (457)	Puerto Gaitán	196	204	179	179	245	245	217	217	247	247	206	210	228	236	211	211
Pg19	26 PG (456)	Puerto Gaitán	194	194	185	191	245	245	217	223	235	245	186	222	236	236	213	213
Pg20	27 PG (455)	Puerto Gaitán	182	194	185	185	245	245	217	223	235	235	206	206	234	240	215	243
Pg21	28 PG (453)	Puerto Gaitán	196	206	185	185	245	247	225	225	247	247	186	186	234	238	251	253
Ini01	17 INI	Puerto Inirida	182	194	179	185	245	245	217	217	243	245	184	194	236	240	213	213
Ini02	18 INI	Puerto Inirida	194	196	185	185	247	247	217	217	245	245	200	200	222	244	215	221
Ini03	19 INI	Puerto Inirida	194	196	185	185	247	247	217	221	245	247	190	190	224	232	213	221
Ini04	20 INI	Puerto Inirida	194	196	179	185	245	245	217	225	245	245	186	202	234	234	211	211
Ini05	21 INI	Puerto Inirida	194	196	185	187	243	243	217	223	243	243	260	288	234	244	213	223
Ini06	22 INI	Puerto Inirida	194	196	183	187	245	245	189	217	245	245	194	194	236	236	193	213
Ini07	23 INI	Puerto Inirida	194	196	179	185	247	247	217	217	245	245	194	196	232	236	227	245
Ini08	24 INI	Puerto Inirida	182	196	179	185	247	247	217	217	237	237	204	204	222	240	207	211
Ini09	25 INI	Puerto Inirida	196	196	179	179	245	245	195	223	229	247	236	238	234	234	225	231
Ini10	26 INI	Puerto Inirida	196	196	179	185	245	247	217	217	229	247	200	208	222	240	213	223
Ini11	27 INI	Puerto Inirida	196	196	185	189	245	245	195	217	243	245	226	248	234	234	213	221
Ini12	28 INI	Puerto Inirida	194	196	179	185	245	245	221	223	245	245	204	204	222	236	239	243
Ini13	29 INI	Puerto Inirida	184	196	173	185			217	217	239	247	198	204	240	246	213	243
Ini14	30 INI	Puerto Inirida	194	196	179	185	241	241	217	225	245	245	246	262	234	240	223	233
Ini15	31 INI	Puerto Inirida	194	198	183	185	245	245	217	217	247	247			236	240	205	217
Ini16	32 INI	Puerto Inirida	182	196	185	185	245	245	217	217	245	245	198	198	238	238	213	217
Ini17	40 INI	Puerto Inirida	194	196	183	183	245	245	225	225	227	245			238	248	211	211
Ini18	41 INI	Puerto Inirida	194	196	183	183	245	249	225	227	245	245	232	232	238	248	197	211
Ini19	42 INI	Puerto Inirida	196	196	179	179	245	245			231	247	188	188	240	240	207	211
Ini20	43 INI	Puerto Inirida	194	196	183	183					245	245	248	256	234	234	217	217
Ini21	44 INI	Puerto Inirida	194	194	179	183	245	245	225	225	245	245	230	230	238	238	211	211
Bar01	26 BAR	Barcelos	190	196	185	187	243	245	219	223	247	247	210	214	232	232	217	217
Bar02	27 BAR	Barcelos	190	196	185	187	245	249	219	219	245	249	210	220	230	232	211	215
Bar03	28 BAR	Barcelos	196	196	187	187	243	243	219	219	247	247	226	226	236	236	217	217
Bar04	29 BAR	Barcelos	190	196	185	189	243	245	219	219	247	247	210	214	232	232	219	219
Bar05	30 BAR	Barcelos	196	196	185	189	247	253	219	219	247	247	230	230	232	236	219	219
Bar06	31 BAR	Barcelos	190	196	185	189	243	249	223	223	247	247	200	200	232	236	217	223
Bar07	32 BAR	Barcelos	190	196	185	187	243	253	219	219	247	247	240	240	232	236	221	225
Bar08	33 BAR	Barcelos	192	196	185	187	247	253	219	219	247	247	192	214	234	234	223	223
Bar09	34 BAR	Barcelos	176	178	185	189	243	253	219	219	247	247	214	214	232	236	217	235
Bar10	35 BAR	Barcelos	190	196	181	187	243	243	223	223	247	247	160	222	232	232	213	219
Bar11	36 BAR	Barcelos	176	182	185	185	243	247	223	223	247	247	224	238	232	232	213	223
Bar12	37 BAR	Barcelos	180	196	181	185	243	245	219	219	247	247	204	204	230	236	213	219
Bar13	38 BAR	Barcelos	190	196	185	185	245	249	223	223	247	247	208	216	234	234	219	235
Bar14	39 BAR	Barcelos	190	196	185	185	241	247	219	223	247	247	208	208	232	234	223	223
Bar15	40 BAR	Barcelos	192	196	185	185	243	253	219	219	247	247	192	214	234	234	217	225
Bar16	42 BAR	Barcelos	188	196	185	189	247	247	219	219	247	247	208	208	232	232	219	219
Bar17	43 BAR	Barcelos	190	196	183	183	245	245	219	219	247	247	206	206	232	236	221	221
Bar18	44 BAR	Barcelos	190	196	185	187	243	245	223	223	247	247	208	222	232	236	223	227
Bar19	45 BAR	Barcelos	196	200	185	187	237	237	219	223	245	247	202	214	232	232	215	225
Bar20	46 BAR	Barcelos	180	196	185	185	241	245	219	219	247	247	194	220	234	234	209	209
Si01	1 SI	Santa Isabel	190	200	185	187	247	251	219	241	245	247	206	206	232	236	215	233
Si02	2 SI	Santa Isabel	190	200	177	181	243	249	237	243	245	247	178	190	246	246	219	219
Si03	3 SI	Santa Isabel	196	200	185	187	237	249	219	219	245	247	204	204	232	232	219	231
Si04	4 SI	Santa Isabel	190	206	181	185	251	251	219	221	245	247	210	210	232	236	213	233
Si05	5 SI	Santa Isabel	190	208	181	185	239	249	219	221	252	252	206	206	230	232	211	215
Si06	6 SI	Santa Isabel	196	200	181	185	237	243	219	223	233	252	232	232	236	236	211	217
Si07	7 SI	Santa Isabel	190	196	185	187	247	247	221	227	247	247			232	236	215	215
Si08	8 SI	Santa Isabel	190	194	181	189	241	243	181	189	231	247	202	222	232	236	221	231
Si09	9 SI	Santa Isabel	190	190	181	185	245	251	223	223	252	252	204	204	230	230	219	235
Si10	10 SI	Santa Isabel	182	196	181	181	247	247	219	223	247	247	218	240	236	236	211	243
Si11	11 SI	Santa Isabel	190	190	183	185	237	237	219	219	229	247	206	220	232	236	213	221
Si12	12 SI	Santa Isabel	196	206	177	187	247	249	217	219	247	247	200	200	228	228	217	217
Si13	13 SI	Santa Isabel	196	200	181	189	245	245	223	223	247	249	206	208	236	236	219	219
Si14	14 SI	Santa Isabel	196	200	185	185	251	251	219	223	247	247	214	214	232	232	229	231
Si15	15 SI	Santa Isabel	196	200	181	185	241	247	223	223	247	252	190	190	248	248	211	223
Si16	16 SI	Santa Isabel	190	196	181	185	247	247	219	219			204	220	232	236	205	215
Si17	17 SI	Santa Isabel	196	206	185	185	237	245	219	219	247	247	206	206	230	236	233	233
Si18	2 si (JP)	Santa Isabel	190	194	189	193	235	241	219	223	247	252	204	204	232	236	223	223
Si19	3 si (JP)	Santa Isabel	190	196	183	183	241	253	219	219	245	247	198	206	228	228	235	239
Si20	4 si (JP)	Santa Isabel	194	196	185	187			219	219					222	222	219	219
SG01	422 SG	São Gabriel da Cachoeira	196	200	181	183			217	223	245	249	190	190	234	238	207	227
SG02	423 SG	São Gabriel da Cachoeira	194	202	183	185	245	245	221	221	252	252	196	196	232	250	219	227
SG03	424 SG	São Gabriel da Cachoeira	196	196	185	187	219	245	223	223	245	245			236	236	215	231
SG04	425 SG	São Gabriel da Cachoeira	190	196	187	189	247	247	217	225	247	247	192	206	230	230	215	215
SG05	426 SG	São Gabriel da Cachoeira	190	196	181	185	237	245	221	221	245	245			234	234	211	217
SG06	427 SG	São Gabriel da Cachoeira	196	196	181	185	241	241	219	223	229	247	226	226	232	240	233	233
SG07	428 SG	São Gabriel da Cachoeira	196	202	185	187	247	247	217	219	247	247	198	198	232	236	215	215
SG08	429 SG	São Gabriel da Cachoeira	196	196	181	187	241	241	217	225	249	249	190	190	232	232	201	229
SG09	430 SG	São Gabriel da Cachoeira	190	196	181	183	245	245	217	223	229	247	202	202	236	236	215	229
SG10	431 SG	São Gabriel da Cachoeira	192	200	181	185			217	223	245	245			222	232	213	213
SG11	500 SG	São Gabriel da Cachoeira	182	196	185	185			217	219	245	247			234	238	213	219
SG12	501 SG	São Gabriel da Cachoeira	208	208	185	185			217	219	243	243			232	232	209	215
SG13	502 SG	São Gabriel da Cachoeira	196	196	185	185			217	219	247	247			232	236	223	223
SG14	503 SG	São Gabriel da Cachoeira	194	196	185	185			217	219	245	247			232	232	213	219
SG15	506 SG	São Gabriel da Cachoeira	196	196	183	185					247	247			222	236	209	221
SG16	507 SG	São Gabriel da Cachoeira	196	196	181	185	219	219			245	247	208	208	232	232	211	219
SG17	508 SG	São Gabriel da Cachoeira	190	190	187	187									234	236
SG18	510 SG	São Gabriel da Cachoeira	192	192	187	187			217	219	252	252	210	210	232	240	213	215
SG19	511 SG	São Gabriel da Cachoeira	196	196	177	177	219	219	217	217			198	198	232	232	197	219
SG20	512 SG	São Gabriel da Cachoeira	192	196					217	217					236	236	209	209
Cuc01	1 CUC	Cucui	180	194	179	179	241	245	223	223	247	247	268	268	232	234	221	225
Cuc02	2 CUC	Cucui	182	196	179	187	235	235	221	221	227	245	226	226	214	232	215	227
Cuc03	3 CUC	Cucui	180	184	179	185	235	245	223	223	245	247	252	272	238	250	219	219
Cuc04	4 CUC	Cucui	196	202	179	185	235	245	213	221	229	247	262	262	232	238	221	221
Cuc05	5 CUC	Cucui	184	196	183	191	235	241	223	223	229	247	256	256	232	234	215	219
Cuc06	6 CUC	Cucui	180	194	187	193	235	235	221	223	229	247	226	276	236	252	215	215
Cuc07	7 CUC	Cucui	198	200	187	189	235	245	221	221	245	245	268	268	232	240	215	215
Cuc08	8 CUC	Cucui	194	198	189	189	235	245	217	223	245	245	252	260	236	252	217	239
Cuc09	9 CUC	Cucui	182	196	179	187	235	245	217	223	229	247			232	250	215	223
Cuc10	10 CUC	Cucui	194	198	179	179	235	245	217	221	245	245	268	272	232	238	219	219
Cuc11	11 CUC	Cucui	194	196	179	191	245	245	213	217	245	245	248	248	232	234	217	227
Cuc12	12 CUC	Cucui	194	200	183	185	235	243	221	221	227	245	238	252	232	234	211	225
Cuc13	13 CUC	Cucui	180	182	179	187	235	245	199	223	245	247	224	224	232	232	215	215
Cuc14	14 CUC	Cucui	180	184	179	185	243	243	213	223	227	245	226	256	232	256	211	215
Cuc15	15 CUC	Cucui	186	200	179	183	235	245	217	223	225	245	244	244	232	232	215	219
Cuc16	16 CUC	Cucui	192	200	185	187	235	245	213	223	227	245	232	260	240	258	213	215
Cuc17	17 CUC	Cucui	180	182	175	189	235	245	217	223	227	245	252	260	236	252	217	217
Cuc18	18 CUC	Cucui			185	187	235	247	221	223	225	245			232	238	215	219
Cuc19	19 CUC	Cucui			183	185	245	245	221	225	225	245			248	248	219	225
Cuc20	20 CUC	Cucui			187	187	235	243	223	223	225	245			238	252	211	219
Cuc21	21 CUC	Cucui			179	185	235	235			247	247			250	250	197	217
